# Supplementary material for: Development of a selective ligand for G–G mismatches of CGG repeat RNA inducing the RNA structural conversion from the G-quadruplex into a hairpin-like structure
Source: Royal Society of Chemistry journal article supplement (doi:10.1039/d2ob00279e), 2022-01-01
Supplement: d2ob00279e1.pdf [file d2ob00279e1.pdf]

Supporting Information

## Development of the selective ligand for G-G mismatches of CGG repeat RNA inducing the RNA structural conversion from the G-quadruplex into the hairpin-like structure

Hiroataka Murase<sup>\*a</sup>, Fumi Nagatsugi<sup>b</sup> and Shigeki Sasaki<sup>\*a</sup>

a. Graduate School of Pharmaceutical Sciences, Nagasaki International University, 2825-7 Huis ten Bosch machi, Sasebo 859-3298, Japan.

b. Institute of Multidisciplinary Research for Advanced Materials (IMRAM), Tohoku University, 2-1-1 Katahira, Aoba-ku, Sendai 980-8577, Japan.

\*Corresponding author. E-mail: murase@niu.ac.jp (H. Murase), sigesasaki@niu.ac.jp (S. Sasaki)

- |                                                       |       |
|-------------------------------------------------------|-------|
| 1. Supplementary data (Fig.S1 – S9)                   | 1 - 5 |
| 2. <sup>1</sup> H-NMR and <sup>13</sup> C-NMR spectra | 6 - 7 |

### 1. Supplementary data

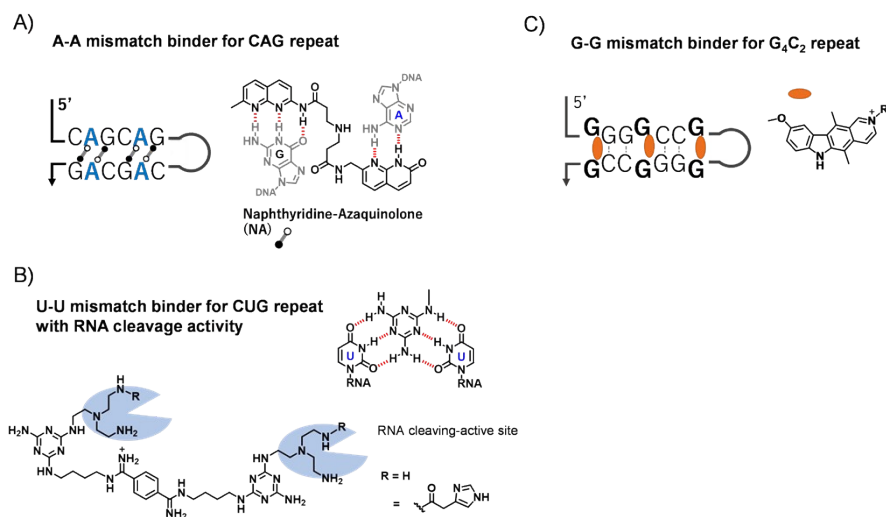

Fig. S1 Previously developed binders for the base mismatch sites of the repeat sequences. A) A-A mismatch binder for CAG repeat reported by Nakatani's group (ref. 9). B) U-U mismatch binder for CUG repeat reported by Zimmerman's group (ref. 13). C) G-G mismatch binder for G<sub>4</sub>C<sub>2</sub> repeat reported by Disney's group (ref. 17).

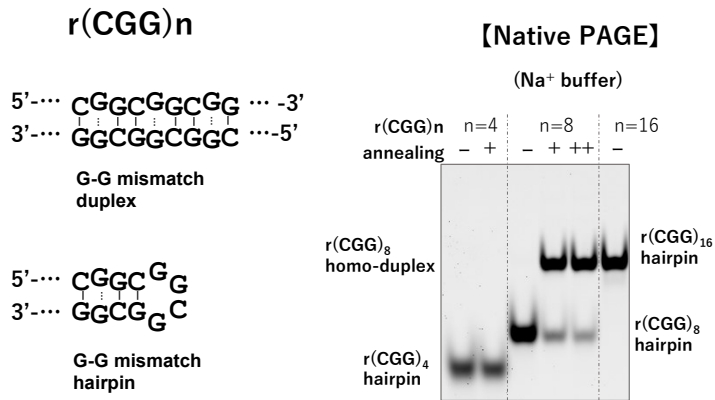

Fig. S2 Native PAGE of r(CG<sub>n</sub>) [n=4: 5 μM, n=8: 2 μM, n=16: 1 μM] in 10 mM HEPES-NaOH buffer pH 7.4 containing 100 mM NaCl. (12% acrylamide, acrylamide/bis=29/1, 0.25xTBE, 160 V for 2 h under 4 °C, stained by SYBR®Gold.

[annealing conditions: 90 °C to r.t. over 2 h (+), overnight (++) or to ice bath immediately (-)]

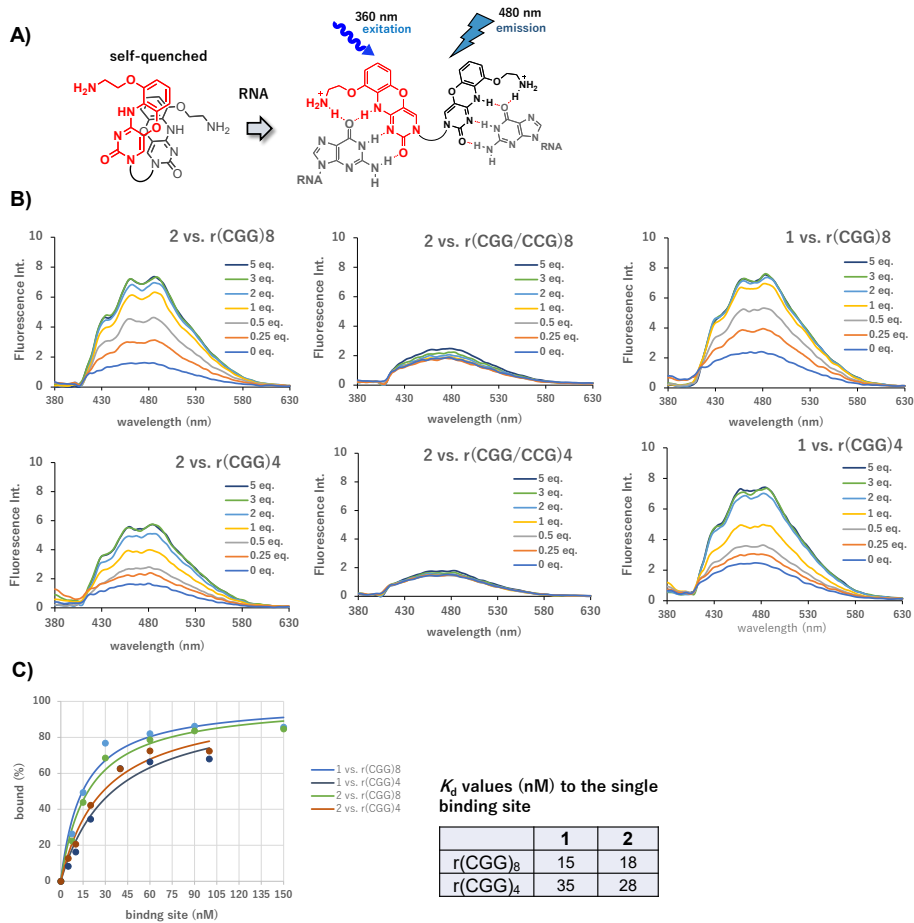

Fig. S3 A) The proposal mechanism of the light-up response of G-clamp-dimer for RNA binding. B) Fluorescence spectra of **2** or **1** (10 nM) in the presence of RNAs (0 to 50 nM) in 10 mM HEPES-NaOH buffer pH 7.4 containing 100 mM NaCl excited by 360 nm light at 25 °C. C) The  $K_d$  values to the single binding site was calculated by the plots of the 480 nm intensity based on the concentrations of the binding sites [r(CG<sub>8</sub>): three binding sites, r(CC<sub>4</sub>): two binding sites].

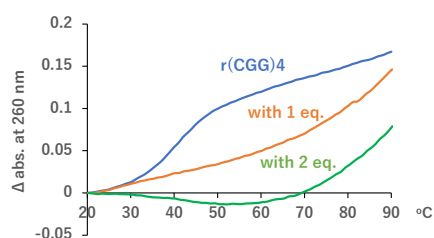

Fig. S4 Thermal melting of 5 μM r(CG<sub>4</sub>) was recorded at 260 nm in the presence of **2** (0, 1 or 2 eq.) in 10 mM HEPES-NaOH buffer pH 7.4 containing 100 mM NaCl under +1 °C/min heating condition.

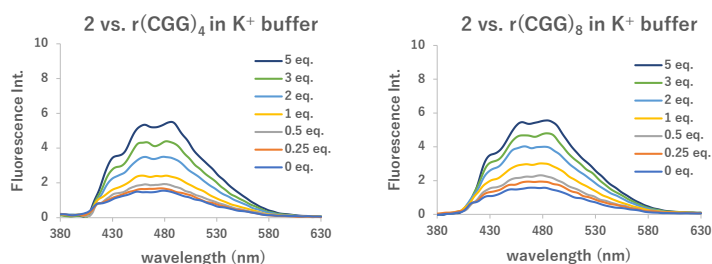

Fig. S5 Fluorescence spectra of **2** (10 nM) in the presence of RNAs (0 to 50 nM) in 10 mM HEPES buffer pH 7.4 containing 100 mM KCl excited by 360 nm light at 25 °C.

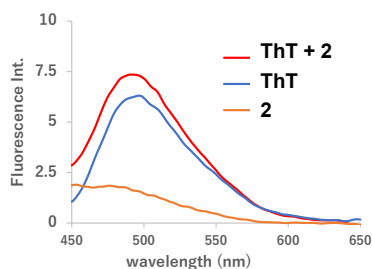

Fig. S6 Fluorescence spectra of **2** (0.2 μM), ThT (0.1 μM) and ThT + **2** in 80 % glycerol excited by 435 nm light at 25 °C.

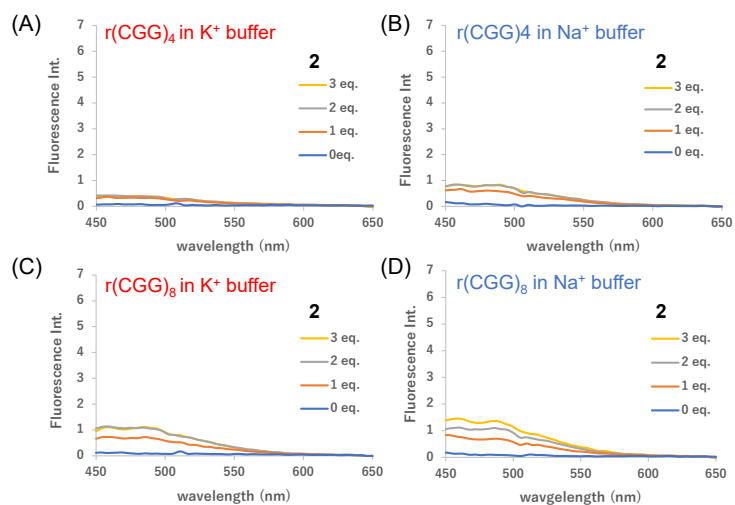

Fig. S7 Fluorescence spectra of **2** (0 to 0.3  $\mu\text{M}$ ) and 0.1  $\mu\text{M}$  RNAs without ThT in 10 mM HEPES buffer pH7.4 containing 100 mM KCl or NaCl, excited by 435 nm light at 25  $^{\circ}\text{C}$ . A)  $r(\text{CGG})_4$  in  $\text{K}^+$  buffer, B)  $r(\text{CGG})_4$  in  $\text{Na}^+$  buffer, C)  $r(\text{CGG})_8$  in  $\text{K}^+$  buffer, D)  $r(\text{CGG})_8$  in  $\text{Na}^+$  buffer.

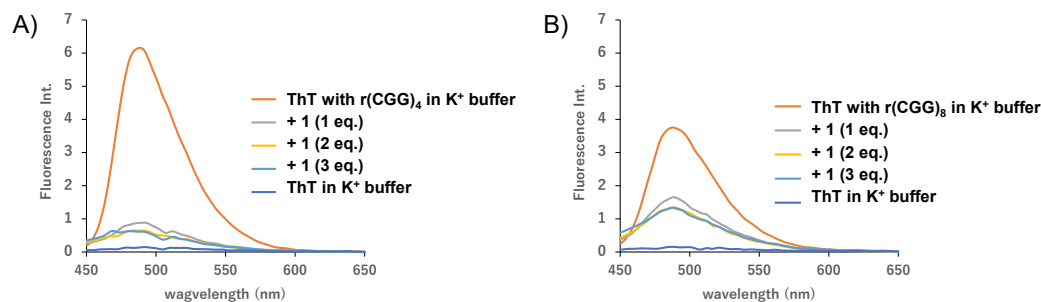

Fig. S8 Fluorescence spectra of thioflavine T (ThT, 0.1  $\mu\text{M}$ ) in the absence or presence of 0.1  $\mu\text{M}$   $r(\text{CGG})_4$  (A) or  $r(\text{CGG})_8$  (B) and **1** (0 to 3 eq.) in 10 mM HEPES buffer pH7.4 containing 100 mM KCl, excited by 435 nm light at 25  $^{\circ}\text{C}$ .

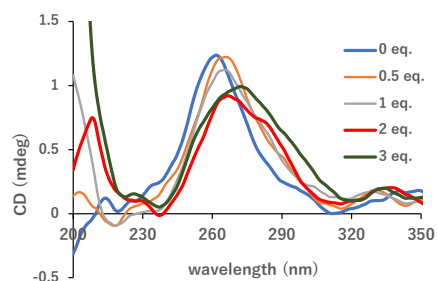

Fig. S9 CD spectrum of 5  $\mu\text{M}$   $r(\text{CGG})_4$  in the presence of **2** (0 to 3 eq.) in 10 mM HEPES-KOH pH 7.4 buffer containing 100 mM KCl at 25  $^{\circ}\text{C}$ .

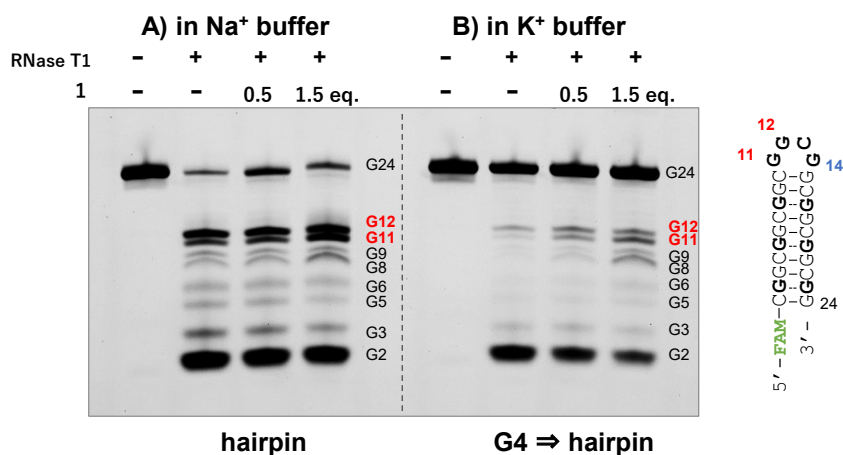

Fig. S10 PAGE analysis of RNase T1 assay. (A) Reactions in the Na<sup>+</sup> buffer, (B) Reactions in the K<sup>+</sup> buffer. The samples containing 5'-FAM-r(CGCG)<sub>8</sub> (2 μM) and **1** (0, 0.5 or 1.5 eq.) in 10 mM HEPES buffer pH 7.4 containing 100 mM NaCl or KCl were treated with RNase T1 (2.5 U/μL) at 15 °C for 10 min. The digested samples were analysed on 15 % polyacrylamide gel containing 7.5 M urea and 18 % formamide.

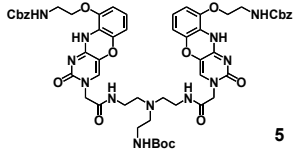

MR-182-dms0

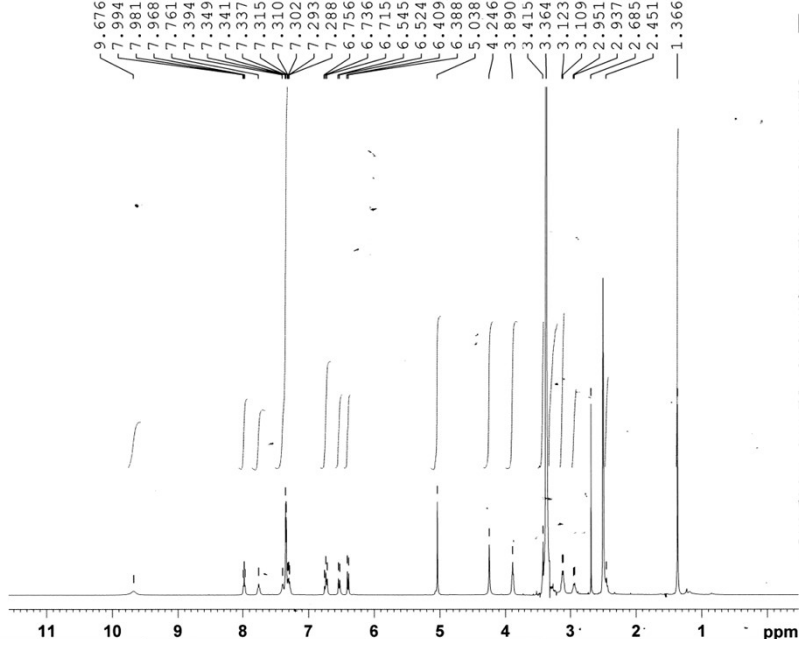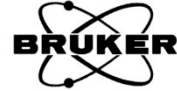

Current Data Parameters  
 NAME MR-182-dms0  
 EXPNO 1  
 PROCNO 1

F2 - Acquisition Parameters  
 Date\_ 20180914  
 Time 14.47  
 INSTRUM spect  
 PROBHD 5 mm PABBI 1H/  
 PULPROG zg30  
 TD 65536  
 SOLVENT DMSO  
 NS 16  
 DS 2  
 SWH 8223.695 Hz  
 FIDRES 0.125483 Hz  
 AQ 3.9846387 sec  
 RG 81.33  
 DW 60.800 usec  
 DE 6.50 usec  
 TE 296.1 K  
 D1 1.00000000 sec  
 TDO 1

===== CHANNEL f1 =====  
 NUC1 1H  
 P1 7.50 usec  
 PLW1 13.19999981 W  
 SFO1 400.1324710 MHz

F2 - Processing parameters  
 SI 65536  
 SF 400.1300032 MHz  
 WDW EM  
 SSB 0  
 LB 0.30 Hz  
 GB 0  
 PC 1.00

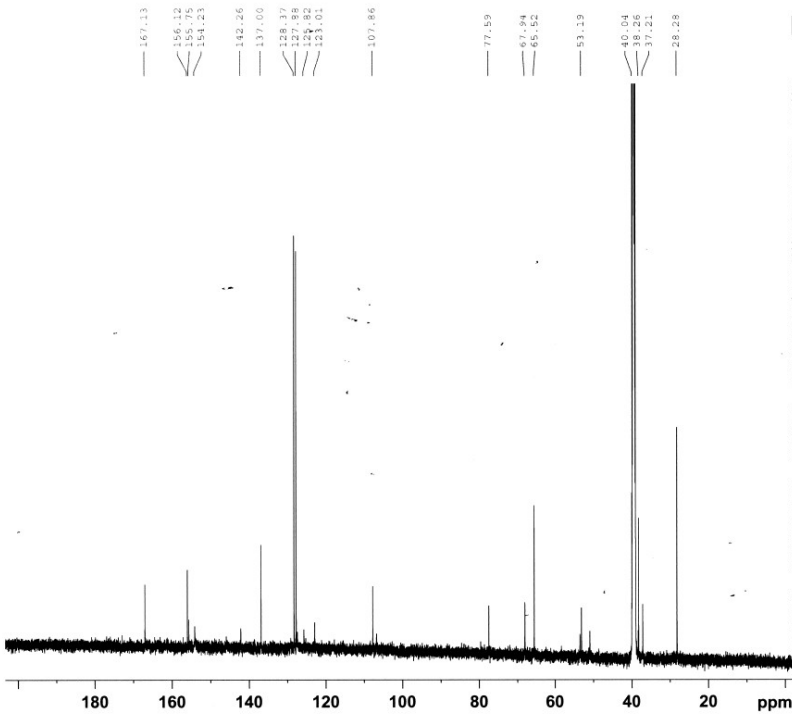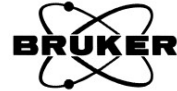

Current Data Parameters  
 NAME MR-182-C13  
 EXPNO 1  
 PROCNO 1

F2 - Acquisition Parameters  
 Date\_ 20180914  
 Time 16.03  
 INSTRUM spect  
 PROBHD 5 mm CPTCI 1H/  
 PULPROG zgpg30  
 TD 65536  
 SOLVENT DMSO  
 NS 1024  
 DS 4  
 SWH 36057.691 Hz  
 FIDRES 0.550197 Hz  
 AQ 0.9087659 sec  
 RG 198.89  
 DW 13.867 usec  
 DE 18.00 usec  
 TE 298.0 K  
 D1 2.00000000 sec  
 D11 0.03000000 sec  
 TDO 1

===== CHANNEL f1 =====  
 SFO1 150.9178981 MHz  
 NUC1 13C  
 P1 12.00 usec  
 PLW1 83.50000000 W

===== CHANNEL f2 =====  
 SFO2 600.1324005 MHz  
 NUC2 1H  
 CPDPRG2 waltz16  
 PCPD2 70.00 usec  
 PLW2 7.50000000 W  
 PLW12 0.09795900 W  
 PLW13 0.04800000 W

F2 - Processing parameters  
 SI 32768  
 SF 150.9028775 MHz  
 WDW EM  
 SSB 0  
 LB 1.00 Hz  
 GB 0  
 PC 1.40

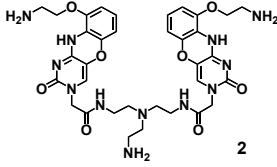

MR-202-HPLC

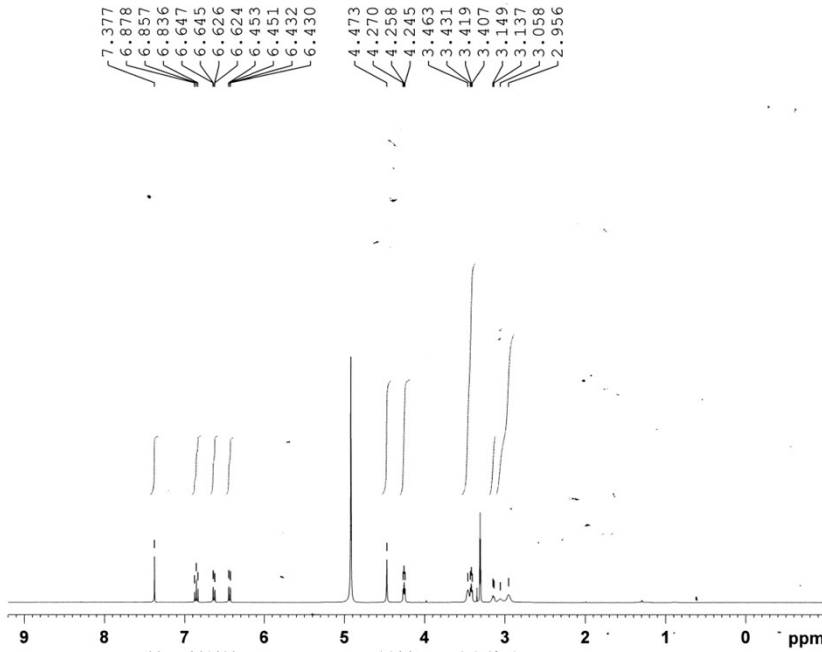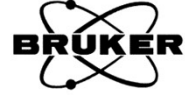

Current Data Parameters  
 NAME MR-202-HPLC  
 EXPNO 1  
 PROCNO 1

F2 - Acquisition Parameters  
 Date\_ 20181126  
 Time 14.19  
 INSTRUM spect  
 PROBHD 5 mm PABBI 1H/  
 PULPROG zg30  
 TD 65536  
 SOLVENT MeOD  
 NS 45  
 DS 2  
 SWH 8223.685 Hz  
 FIDRES 0.125483 Hz  
 AQ 3.9846387 sec  
 RG 33.3  
 DW 60.800 usec  
 DE 6.50 usec  
 TE 293.7 K  
 D1 1.00000000 sec  
 TD0 1

===== CHANNEL f1 =====  
 NUC1 1H  
 P1 7.50 usec  
 PLW1 13.19999981 W  
 SFO1 400.1324710 MHz

F2 - Processing parameters  
 SI 65536  
 SF 400.1300078 MHz  
 WDW EM  
 SSB 0  
 LB 0.30 Hz  
 GB 0  
 PC 1.00

MR-202-C13

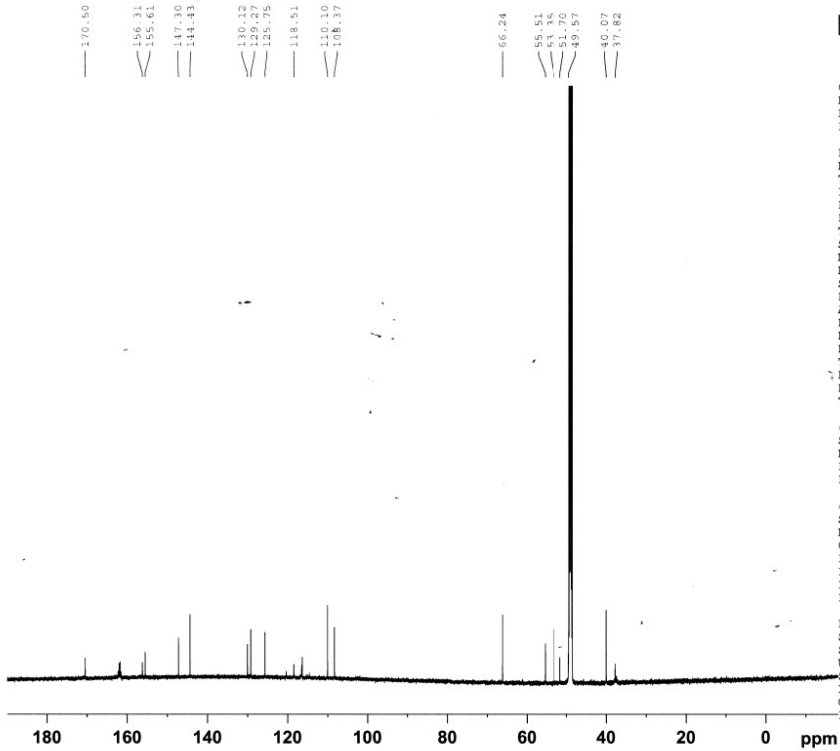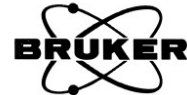

Current Data Parameters  
 NAME MR-202-C13  
 EXPNO 1  
 PROCNO 1

F2 - Acquisition Parameters  
 Date\_ 20181126  
 Time 15.37  
 INSTRUM spect  
 PROBHD 5 mm CP131 1H/  
 PULPROG zgpg30  
 TD 65536  
 SOLVENT MeOD  
 NS 835  
 DS 4  
 SWH 36057.691 Hz  
 FIDRES 0.550197 Hz  
 AQ 0.9087659 sec  
 RG 198.89  
 DW 13.867 usec  
 DE 18.00 usec  
 TE 298.0 K  
 D1 2.00000000 sec  
 D11 0.03000000 sec  
 TD0 1

===== CHANNEL f1 =====  
 SFO1 150.9178981 MHz  
 NUC1 13C  
 P1 12.00 usec  
 PLW1 83.50000000 W

===== CHANNEL f2 =====  
 SFO2 600.1324005 MHz  
 NUC2 1H  
 CPDPRG2 waltz16  
 PCPD2 70.00 usec  
 PLW2 7.50000000 W  
 PLW12 0.09795900 W  
 PLW13 0.04800000 W

F2 - Processing parameters  
 SI 32768  
 SF 150.9025969 MHz  
 WDW EM  
 SSB 0  
 LB 1.00 Hz  
 GB 0  
 PC 1.40
